# Supplementary material for: The MATEX cohort – a Finnish population register birth cohort to study health effects of prenatal exposures
Source: Springer Nature journal article supplement (doi:10.1186/s12889-017-4881-8), 2017-11-07
Supplement: MOESM1 [file 15205306]

# Supplemental material

## The MATEX cohort – a Finnish population register birth cohort to study health effects of prenatal exposures

Isabell K. Rumrich <sup>1,2,\*</sup>, Kirsi Vähäkangas <sup>3</sup>, Matti Viluksela <sup>1,2</sup>, Mika Gissler <sup>4</sup>, Heljä-Marja Surcel <sup>5</sup>, Hanna de Ruyter <sup>6</sup>, Jukka Jokinen <sup>2</sup>, Otto Hänninen <sup>2</sup>

<sup>1</sup> University of Eastern Finland (UEF), Department of Environmental and Biological Sciences, Kuopio, Finland

<sup>2</sup> National Institute for Health and Welfare (THL), Department of Public Health Solutions, Kuopio, Finland

<sup>3</sup> University of Eastern Finland (UEF), School of Pharmacy/Toxicology, Kuopio, Finland

<sup>4</sup> National Institute for Health and Welfare, Department of Information Services, Helsinki Finland

<sup>5</sup> University of Turku

<sup>6</sup> Southern Ostrobothnia Central Hospital, Seinäjoki, Finland

\* corresponding author; [Isabell.Rumrich@thl.fi](mailto:Isabell.Rumrich@thl.fi)

Isabell K. Rumrich: [Isabell.Rumrich@thl.fi](mailto:Isabell.Rumrich@thl.fi)

Kirsi Vähäkangas: [kirsi.vahakangas@uef.fi](mailto:kirsi.vahakangas@uef.fi)

Matti Viluksela: [matti.viluksela@thl.fi](mailto:matti.viluksela@thl.fi)

Mika Gissler: [mika.gissler@thl.fi](mailto:mika.gissler@thl.fi)

Heljä-Marja Surcel: [helja-marja.surcel@thl.fi](mailto:helja-marja.surcel@thl.fi)

Hanna de Ruyter: [Hanna.deRuyter@thl.fi](mailto:Hanna.deRuyter@thl.fi)

Jukka Jokinen: [jukka.jokinen@thl.fi](mailto:jukka.jokinen@thl.fi)

Otto Hänninen: [otto.hanninen@thl.fi](mailto:otto.hanninen@thl.fi)

## Supplementary material

### 1. Data availability in the Medical Birth Register

The MATEX baseline cohort comprises all birth recorded in the Finnish Medical Birth Register (MBR) between 1987 and 2015. Our baseline cohort data are limited to the availability in the MBR. The MBR structure has been updated three times (1190, 1996, 2004), which affects the availability of some data (Figure S1).

| Variable                         |                                  | 1987 | 1990 | 1995 | 2000 | 2005 | 2010 | 2015 |
|----------------------------------|----------------------------------|------|------|------|------|------|------|------|
| <b>Data available in the MBR</b> | <b>Mother</b>                    |      |      |      |      |      |      |      |
|                                  | 1 Personal information           |      |      |      |      |      |      |      |
|                                  | 2 Occupation                     |      |      |      |      |      |      |      |
|                                  | 3 Previous pregnancies           |      |      |      |      |      |      |      |
|                                  | 4 Previous birth                 |      |      |      |      |      |      |      |
|                                  | 5 Maternal smoking               | *    | *    | *    |      |      |      |      |
|                                  | 6 Previous sections              |      |      |      |      |      |      |      |
|                                  | 7 Previous ectopic pregnancies   |      |      |      |      |      |      |      |
|                                  | 8 Previous induced abortions     |      |      |      |      |      |      |      |
|                                  | 9 Citizenship                    |      |      |      |      |      |      |      |
|                                  | 10 Pre-pregnancy height & weight |      |      |      |      |      |      |      |
|                                  | <b>Child</b>                     |      |      |      |      |      |      |      |
|                                  | 11 Birth outcomes                |      |      |      |      |      |      |      |
|                                  | 12 Diagnoses                     |      |      |      |      |      |      |      |
|                                  | 13 Location at 1 week            |      |      |      |      |      |      |      |
|                                  | 14 Apgar score 5min              |      |      |      |      |      |      |      |
|                                  | 15 Head circumference            |      |      |      |      |      |      |      |
|                                  | <b>Pregnancy</b>                 |      |      |      |      |      |      |      |
|                                  | 16 Diagnoses                     |      |      |      |      |      |      |      |
|                                  | 17 Risk factors                  |      |      |      |      |      |      |      |
|                                  | 18 Procedures                    |      |      |      |      |      |      |      |
|                                  | 19 Ultrasound screening          |      |      |      |      |      |      |      |
|                                  | 20 Diagnostics & treatment       |      |      |      |      |      |      |      |
|                                  | 21 Assisted pregnancy            |      |      |      |      |      |      |      |
|                                  | <b>Delivery</b>                  |      |      |      |      |      |      |      |
|                                  | 22 Hospital                      |      |      |      |      |      |      |      |
|                                  | 23 Place                         |      |      |      |      |      |      |      |
|                                  | 24 Pain relief                   |      |      |      |      |      |      |      |
|                                  | 25 Mode of delivery              |      |      |      |      |      |      |      |
| 26 Induction of labour           |                                  |      |      |      |      |      |      |      |
| 28 Procedures                    |                                  |      |      |      |      |      |      |      |
| 29 pH value foetal blood         |                                  |      |      |      |      |      |      |      |

not available
  available
  \* only available for 1st trimester

**Figure S1. Example of availability of various data in the baseline MATEX cohort from the Medical Birth Register 1987-2015 (total of 1.7 million births)**

Overall, roughly 100 variables are available for the analyses (Table S1). Some variables are measured continuous variables (e.g. Variables 15, 16, 37, 73, 74, 75 in Table S1), whereas other variables are categorical (e.g. Variables 3, 7, 36, 91 in Table S1) or binary (e.g. Variables 19-33, 39-65, 78-88 in Table S1). Maternal diagnoses during pregnancy, diagnoses during delivery and diagnoses in the infant until 7 day of age or discharge from hospital (whichever occurs first) are available as ICD codes (ICD-9 for 1987-1995 and ICD-10 for 1996-2015).

**Table S1. Available data in the MATEX cohort**

| Variable | Period available                                               | Mean       | Incidence rate <sup>a</sup> |
|----------|----------------------------------------------------------------|------------|-----------------------------|
| 1        | Socioeconomic status                                           |            |                             |
| 2        | Professional classification                                    |            |                             |
| 3        | Municipality of Residence of mother                            |            |                             |
| 4        | Citizenship of mother                                          | 1990-2015  |                             |
| 5        | Marital status of the mother                                   |            |                             |
| 6        | Cohabiting                                                     |            |                             |
| 7        | Previous pregnancies (number)                                  | 1.5        |                             |
| 8        | Previous miscarriages (number)                                 | 0.3        |                             |
| 9        | Previous induced abortions (number)                            | 0.1        |                             |
| 10       | Previous ectopic pregnancies (number)                          | 0.01       |                             |
| 11       | Previous births (number)                                       | 1          |                             |
| 12       | Previous birth when at least one infant was stillborn (number) | 0.01       |                             |
| 13       | Pre-pregnancy weight mother, kg                                | 2004-2015  | 67kg                        |
| 14       | Length of mother, cm                                           | 2004-2015  | 166cm                       |
| 15       | Maternal smoking                                               |            | 15 %                        |
| 16       | Previous section                                               | 1990-2015  | 10 %                        |
| 17       | Assisted reproduction with (IVF, ICSI, FET)                    | 1990-2015  | 2 %                         |
| 18       | Intrauterine insemination                                      | 2004-2015  | 1 %                         |
| 19       | Ovulation induction                                            | 2004-2015  | 1 %                         |
| 20       | 1. trimester serum screening                                   | 2004-2015  | 32 %                        |
| 21       | 2. trimester serum screening                                   | 2004-2015  | 2 %                         |
| 22       | 1. trimester ultrasound                                        | 1990-2015  | 49 %                        |
| 23       | 2. trimester ultrasound                                        | 2004-2015  | 60 %                        |
| 24       | Chorionvillusbiopsy                                            | 1990-2015  | 1 %                         |
| 25       | Amniocentesis                                                  | 1990-2015  | 3 %                         |
| 26       | Thrombosis prophylaxes                                         | 2004-2015  | 1 %                         |
| 27       | Glucoses tested                                                | 2004-2015  | 43 %                        |
| 28       | Glucoses tested and pathological                               | 2004-2015  | 12 %                        |
| 29       | Insulin treatment started during pregnancy                     | 2004-2015  | 2 %                         |
| 30       | Anemia (<100g/l)                                               | 2004-2015  | 3 %                         |
| 31       | Antenatal corticosteroid treatment                             | 2004-2015  | 3 %                         |
| 32       | Maternal diagnosis during pregnancy (as ICD code)              |            |                             |
| 33       | Maternity hospital                                             |            |                             |
| 34       | Place of birth                                                 |            |                             |
| 35       | Gestational age, weeks +days, best estimate                    | 39+5 (W+D) |                             |
| 36       | Mode of delivery                                               |            |                             |
| 37       | Epidural anesthesia                                            |            | 30 %                        |
| 38       | Spinal anesthesia                                              | 2004-2015  | 14 %                        |
| 39       | Combined spinal epidural anesthesia                            | 2004-2015  | 1 %                         |
| 40       | Paracervical analgesia                                         | 1990-2015  | 16 %                        |
| 41       | Pudendal analgesia                                             | 1990-2015  | 3 %                         |
| 42       | Nitrous oxide                                                  | 1990-2015  | 45 %                        |
| 43       | Other medical pain relief                                      | 2004-2015  | 12 %                        |
| 44       | Other non-medical pain relief                                  | 2004-2015  | 24 %                        |
| 45       | Induced labor                                                  | 1987-2015  | 17 %                        |
| 46       | Amniotomy                                                      | 1990-2015  | 44 %                        |
| 47       | Oxytocin                                                       | 1990-2015  | 42 %                        |
| 48       | Prostaglandin                                                  | 1990-2015  | 8 %                         |
| 49       | Amnion infusion                                                | 2004-2015  | 0.1 %                       |
| 50       | Episiotomy                                                     | 1990-2015  | 30 %                        |
| 51       | Manual extraction of the placenta                              | 1990-2015  | 1 %                         |
| 52       | Curettage                                                      | 1990-2015  | 1 %                         |
| 53       | Suturing of 3.-4. degree ruptures                              | 2004-2015  | 1 %                         |
| 54       | Mother transferred from other hospital                         | 1990-2015  | 0.3 %                       |
| 55       | Determining the pH value of foetal blood                       | 1990-2015  | 4 %                         |
| 56       | Blood transfusion during birth                                 | 2003-2015  | 2 %                         |
| 57       | Placenta Previa                                                | 1990-2015  | 0.3 %                       |
| 58       | Ablatio placentae                                              | 1990-2015  | 0.2 %                       |

|    |                                       |                      |                   |
|----|---------------------------------------|----------------------|-------------------|
| 59 | Eclampsia                             | 1990-2015            | 0.1 %             |
| 60 | Asphyxia                              | 1990-2015            | 3 %               |
| 61 | Breech                                | 1990-2015            | 3 %               |
| 62 | Other abnormal presentation           | 1990-2015            | 3 %               |
| 63 | Shoulder dystocia                     | 2004-2015            | 0.2 %             |
| 64 | Diagnosis at delivery (as ICD code)   |                      |                   |
| 65 | Year of birth of child                | 1987-2015            |                   |
| 66 | Sex                                   | 1987-2015            |                   |
| 67 | The infant born live/stillborn        | 1987-2015            | 0.4% <sup>b</sup> |
| 68 | Number of fetuses, 1-4                | 1987-2015            | 3 %               |
| 69 | Code defined for each multiple birth  | 1987-2015            |                   |
| 70 | Birth order, A-D                      | 1987-2015            |                   |
| 71 | Birth weight, g                       | 1987-2015            | 3.5kg             |
| 72 | Birth length, cm                      | 1987-2015            | 50cm              |
| 73 | Head circumference, cm                | 2004-2015            | 35cm              |
| 74 | 1min APGAR score                      | 1987-2015            |                   |
| 75 | 5min APGAR score                      | 1987-1990, 2004-2015 |                   |
| 76 | Surveillance                          | 1991-2015            |                   |
| 77 | Treatment in other hospital           | 1991-2015            |                   |
| 78 | Respirator treatment                  | 1990-2015            | 1 %               |
| 79 | Recovery intubation                   | 1990-2015            | 1 %               |
| 80 | Blood transfusion                     | 1990-2015            | 0 %               |
| 81 | Phototherapy                          | 1990-2015            | 6 %               |
| 82 | Antibiotics treatment                 | 1990-2015            | 6 %               |
| 83 | K vitamin treatment                   | 2004-2015            | 96 %              |
| 84 | BCG vaccination                       | 2004-2015            | 22 %              |
| 85 | Hypothyroid screening                 | 2004-2015            | 95 %              |
| 86 | Metabolic screening                   | 2004-2015            | 5 %               |
| 87 | Diagnosis of the infant (as ICD code) | 1987-1990, 1996-2015 |                   |
| 88 | Infant mortality                      | 1987-2015            | 0.7% <sup>c</sup> |
| 89 | Perinatal mortality                   | 1987-2015            | 0.6% <sup>d</sup> |
| 90 | Location of child at 7 days           | 1987-2015            |                   |
| 91 | Maternal age at birth, years          | 1987-2015            | 29 years          |
| 92 | Size for gestational age              | 1987-2015            |                   |
| 93 | Date of birth child                   | 1987-2015            |                   |
| 94 | Date of birth mother                  | 1987-2015            |                   |
| 95 | Discharge date child                  | 1987-2015            |                   |
| 96 | Date of death child                   | 1987-2015            |                   |
| 97 | Admittance date mother                | 1990-2015            |                   |
| 98 | Discharge date mother                 | 1990-2015            |                   |
| 99 | Start last menstruation               | 1990-2015            |                   |

<sup>a</sup> for binary variables (yes/no); <sup>b</sup> Stillbirth rate; <sup>c</sup> Mortality rate during 1<sup>st</sup> year of life (including stillbirths); <sup>d</sup> mortality rate during 1<sup>st</sup> week of life (including stillbirths)

## 2. Diagnoses in the child and mother

The MATEX cohort includes any kind of diagnoses as detailed ICD codes (1987 to 1995 as ICD-9 code and 1996-2015 as ICD-10) in the mother throughout pregnancy and in the infant in the first week of life or until discharge from hospital (whichever occurred first).

For 58,090 children out of 1,167,357 a diagnoses for some kind of congenital malformation was recorded in the Medical Birth Register. The incidence rate is 5 % for any malformations. 4,313 children were diagnosed with multiple malformations. The most common type of congenital malformations are malformations and deformations of the musculoskeletal system (ICD-10 Q95-Q79), whereas congenital malformations of the nervous system (ICD-10 Q00-Q07) and of the respiratory system (ICD-10 Q30-Q34) have been recorded less than 1,000 times in 20 years (Table S2).

**Table S2. Congenital malformation (according to ICD-10) incidence rate (child with at least one diagnoses per group) recorded in the Medical Birth Register between 1996 and 2015**

|                                                                                | ICD-10 code | Incidence | Incidence rate |
|--------------------------------------------------------------------------------|-------------|-----------|----------------|
| <b>Congenital malformations of the Nervous system<sup>1</sup></b>              | Q00-Q07     | 601       | 0.1 %          |
| <b>Eye, ear, face and neck</b>                                                 | Q10-Q18     | 2,529     | 0.2 %          |
| <b>Circulatory system</b>                                                      | Q20-Q28     | 11,637    | 1.0 %          |
| <b>Respiratory system</b>                                                      | Q30-Q34     | 465       | 0.04 %         |
| <b>Digestive system</b>                                                        | Q38-Q45     | 11,410    | 1.0 %          |
| <b>Genital organs</b>                                                          | Q50-Q56     | 9,371     | 0.8 %          |
| <b>Urinary system</b>                                                          | Q60-Q64     | 1,902     | 0.2 %          |
| <b>Cleft lip and cleft palate<sup>1</sup></b>                                  | Q35-Q37     | 1,951     | 0.2 %          |
| <b>Congenital malformations and deformations of the musculoskeletal system</b> | Q65-Q79     | 16,050    | 1.4 %          |
| <b>Other congenital malformations<sup>2</sup></b>                              | Q80-Q89     | 4,112     | 0.4 %          |
| <b>Chromosomal abnormalities, not elsewhere<sup>classified 1,3</sup></b>       | Q90-Q99     | 1,370     | 0.1 %          |

<sup>1</sup> Potentially heavily influenced by induced abortion leading to underestimation of true incidence in the MBR (Congenital anomalies 1993-2011, THL)

<sup>2</sup> for example, malformations of the skin, breast, or integument

<sup>3</sup> for example, Down syndrome, Edwards syndrome, Patau syndrome, Turner syndrome, Klinefelter syndrome

Children in the MATEX cohort were mainly affected by disorders related to length of gestation and foetal growth (recorded for 91,500 children). Additionally, jaundice and the effect of maternal diabetes were diagnosed regularly. The most common birth trauma was a broken collarbone. Digestive system disorders were rarely diagnosed in the first week of life. About 15,000 children were affected by asphyxia and an additional 17,500 children were affected by transient tachypnoea of new-born (Table S3).

**Table S3. Selected diagnoses recorded for ICD-10 diagnoses group of “Certain conditions originating in the perinatal period” (ICD-10 codes P00-P96). Number of diagnoses are listed for the 10 disease and disorder blocks defined in ICD-10 and for each block, all specific diagnose codes are given if they were recorded at least for 1,000 fetuses or newborns.<sup>1</sup>**

|           | <b>Diagnoses in<br/>Foetus and new-born</b>                                                | <b>ICD-10<br/>code</b> | <b>#<br/>Diagnoses</b> | <b>Incidence<br/>rate</b> |
|-----------|--------------------------------------------------------------------------------------------|------------------------|------------------------|---------------------------|
| <b>1</b>  | <b>affected by maternal factors and by complications of pregnancy, labour and delivery</b> | <b>P000-P04</b>        | <b>74,001</b>          |                           |
| 1.1       | affected by maternal hypertensive disorders                                                | P00.0                  | 10,268                 | 0.9 %                     |
| 1.4       | affected by premature rupture of membranes                                                 | P01.1                  | 20,122                 | 1.7 %                     |
| 1.6       | affected by other forms of placental separation and haemorrhage                            | P02.1                  | 1,178                  | 0.1 %                     |
| <b>2</b>  | <b>Disorders related to length of gestation and foetal growth</b>                          | <b>P05-P08</b>         | <b>91,509</b>          |                           |
| 2.1       | Light for gestational age                                                                  | P05.0                  | 6,312                  | 0.5 %                     |
| 2.2       | Small for gestational age                                                                  | P05.1                  | 10,179                 | 0.9 %                     |
| 2.3       | Extremely low birth weight                                                                 | P07.0                  | 1,585                  | 0.1 %                     |
| 2.4       | Other low birth weight                                                                     | P07.1                  | 20,896                 | 1.8 %                     |
| 2.5       | Extreme immaturity                                                                         | P07.2                  | 1,898                  | 0.2 %                     |
| 2.6       | Other preterm infants                                                                      | P07.3                  | 42,278                 | 3.6 %                     |
| 2.7       | Exceptionally large baby                                                                   | P08.0                  | 11,875                 | 1.0 %                     |
| 2.8       | Other heavy for gestational age infants                                                    | P08.1                  | 5,108                  | 0.4 %                     |
| 2.9       | Post-term infant, not heavy for gestational age                                            | P08.2                  | 6,905                  | 0.6 %                     |
| <b>3</b>  | <b>Birth trauma</b>                                                                        | <b>P10-P15</b>         | <b>26,912</b>          |                           |
| <b>4</b>  | <b>Respiratory and cardiovascular disorders specific to the perinatal period</b>           | <b>P20-P29</b>         | <b>68,638</b>          |                           |
| 4.1       | Intrauterine hypoxia first noted during labour and delivery                                | P20.1                  | 1,965                  | 0.2 %                     |
| 4.2       | Severe birth asphyxia                                                                      | P21.0                  | 4,029                  | 0.3 %                     |
| 4.3       | Mild and moderate birth asphyxia                                                           | P21.1                  | 10,900                 | 0.9 %                     |
| 4.4       | Respiratory distress syndrome                                                              | P22.0                  | 6,162                  | 0.5 %                     |
| 4.5       | Transient tachypnoea                                                                       | P22.1                  | 17,567                 | 1.5 %                     |
| 4.6       | Other respiratory distress                                                                 | P22.8                  | 1,638                  | 0.1 %                     |
| 4.7       | Respiratory distress, unspecified                                                          | P22.9                  | 6,314                  | 0.5 %                     |
| 4.8       | Neonatal aspiration of meconium                                                            | P24.0                  | 2,131                  | 0.2 %                     |
| 4.9       | Pneumothorax originating in the perinatal period                                           | P25.1                  | 2,619                  | 0.2 %                     |
| 4.10      | Persistent foetal circulation                                                              | P29.3                  | 2,423                  | 0.2 %                     |
| 4.11      | Cardiovascular disorder originating in the perinatal period, unspecified                   | P29.9                  | 5,757                  | 0.5 %                     |
| <b>5</b>  | <b>Infections specific to the perinatal period</b>                                         | <b>P35-P39</b>         | <b>35,142</b>          |                           |
| <b>6</b>  | <b>Haemorrhagic and haematological disorders of foetus and new-born</b>                    | <b>P50-P61</b>         | <b>65,323</b>          |                           |
| 6.3       | Neonatal jaundice associated with preterm delivery                                         | P59.0                  | 15,364                 | 1.3 %                     |
| 6.4       | Neonatal jaundice, unspecified                                                             | P59.9                  | 39,147                 | 3.4 %                     |
| <b>7</b>  | <b>Transitory endocrine and metabolic disorders specific to foetus and new-born</b>        | <b>P70-P74</b>         | <b>55,934</b>          |                           |
| 7.1       | Syndrome of infant of mother with gestational diabetes                                     | P70.0                  | 25,274                 | 2.2 %                     |
| 7.2       | Syndrome of infant of a diabetic mother                                                    | P70.1                  | 7,061                  | 0.6 %                     |
| 7.3       | Other neonatal hypoglycaemia                                                               | P70.4                  | 25,123                 | 2.2 %                     |
| 7.4       | Other neonatal hypocalcaemia                                                               | P71.1                  | 1,333                  | 0.1 %                     |
| <b>8</b>  | <b>Digestive system disorders of foetus and new-born</b>                                   | <b>P75-P78</b>         | <b>601</b>             |                           |
| <b>9</b>  | <b>Conditions involving the integument and temperature regulation</b>                      | <b>P80-P83</b>         | <b>5,488</b>           |                           |
| 9.1       | Neonatal erythema toxicum                                                                  | P83.1                  | 1,713                  | 0.1 %                     |
| 9.2       | Congenital hydrocele                                                                       | P83.5                  | 3,001                  | 0.3 %                     |
| <b>10</b> | <b>Other disorders originating in the perinatal period</b>                                 | <b>P90-P96</b>         | <b>6,314</b>           |                           |

<sup>1</sup> Only diagnoses recorded between 1996 and 2015 are listed, because previous to 1996 ICD-9 codes were used and they are not fully compatible with the grouping of diagnoses in ICD-10.

The main complications during labour and delivery were due to malposition or malpresentation of the foetus and foetal stress. Premature rupture of membranes and false labour required maternal care most regularly. More than 70,000 mothers had diabetes mellitus during pregnancy and about 28,000 mothers developed hypertension during pregnancy (Table S4).

**Table S4. Selected diagnoses in the mother related to pregnancy, childbirth and the puerperium (ICD-10 codes O00-O99).** Numbers of diagnoses are listed for the 10 disease and disorder blocks defined in ICD-10 and for each block, more specific diagnoses codes are given if there were at least 1,000 times recorded.<sup>1</sup>

| Diagnoses                                                                                           | ICD-10 code    | # Diagnoses    | Incidence rate |
|-----------------------------------------------------------------------------------------------------|----------------|----------------|----------------|
| <b>1 Pregnancy with abortive outcome</b>                                                            | <b>O00-O08</b> | <b>426</b>     |                |
| <b>2 Oedema, proteinuria and hypertensive disorders in pregnancy, childbirth and the puerperium</b> | <b>O10-O16</b> | <b>46,240</b>  |                |
| 2.4 Gestational [pregnancy-induced] hypertension                                                    | O13            | 20,799         | 1.8 %          |
| 2.5 Pre-eclampsia                                                                                   | O14            | 14,857         | 1.3 %          |
| <b>3 Other maternal disorders predominantly related to pregnancy</b>                                | <b>O20-O29</b> | <b>92,816</b>  |                |
| 3.1 Haemorrhage in early pregnancy                                                                  | O20            | 3,087          | 0.3 %          |
| 3.3 Venous complications and haemorrhoids in pregnancy                                              | O22            | 1,223          | 0.1 %          |
| 3.4 Diabetes mellitus in pregnancy                                                                  | O24            | 71,685         | 6.1 %          |
| <b>4 Maternal care related to the foetus and amniotic cavity and possible delivery problems</b>     | <b>O30-O48</b> | <b>96,056</b>  |                |
| 4.1 Polyhydramnios                                                                                  | O40            | 3,503          | 0.3 %          |
| 4.2 Other disorders of amniotic fluid and membranes                                                 | O41            | 12,828         | 1.1 %          |
| 4.3 Premature rupture of membranes                                                                  | O42            | 19,162         | 1.6 %          |
| 4.4 Placenta praevia                                                                                | O44            | 3,437          | 0.3 %          |
| 4.5 Premature separation of placenta [abruptio placentae]                                           | O45            | 2,014          | 0.2 %          |
| 4.6 Antepartum haemorrhage, not elsewhere classified                                                | O46            | 5,177          | 0.4 %          |
| <b>5 Complications of labour and delivery</b>                                                       | <b>O60-O75</b> | <b>18,4047</b> |                |
| 5.1 Preterm labour and delivery                                                                     | O60            | 15,543         | 1.3 %          |
| 5.5 Obstructed labour due to malposition and malpresentation of foetus                              | O64            | 29,117         | 2.5 %          |
| 5.6 Obstructed labour due to maternal pelvic abnormality                                            | O65            | 5,411          | 0.5 %          |
| 5.9 Labour and delivery complicated by foetal stress [distress]                                     | O68            | 54,011         | 4.6 %          |
| 5.10 Labour and delivery complicated by umbilical cord complications                                | O69            | 3,996          | 0.3 %          |
| 5.11 Perineal laceration during delivery                                                            | O70            | 24,108         | 2.1 %          |
| <b>6 Delivery</b>                                                                                   | <b>O80-O84</b> | <b>549,008</b> |                |
| <b>7 Complications predominantly related to the puerperium</b>                                      | <b>O85-O92</b> | <b>3,397</b>   |                |
| <b>8 Other obstetric conditions, not elsewhere classified</b>                                       | <b>O94-O99</b> | <b>43,009</b>  |                |

<sup>1</sup> Only diagnoses recorded between 1996 and 2015 are listed, because previous to 1996 ICD-9 codes were used and they are not fully compatible with the grouping of diagnoses in ICD-10.

### 3. Examples of use of MBR data in published research

The Finnish Medical Birth Register is used in various research fields (Table S5). Most often it is used to identify study populations for exposure outcome relationships. It is either used for identification of a cohort, or controls in case of a case-control study design. Additionally, the MBR is used to assess exposures and risk factors, for example maternal smoking and maternal age. Furthermore, the MBR has been used to study trends of disease frequency over time in the Finnish population. MBR data have been used to evaluate the quality of health care in different settings. Most studies have been published in the last ten year, but the earliest publications are from the 1990's, only a few years after the establishment of the MBR.

**Table S5. Examples of previous studies utilizing the Finnish Medical Birth Register (MBR)**

| Author                                                               | Title                                                                                                                                                                                    | MBR data used (years) | Exposure                                                 | Outcome under investigation                                                 |
|----------------------------------------------------------------------|------------------------------------------------------------------------------------------------------------------------------------------------------------------------------------------|-----------------------|----------------------------------------------------------|-----------------------------------------------------------------------------|
| <b>Identification of study population for exposure-outcome study</b> |                                                                                                                                                                                          |                       |                                                          |                                                                             |
| 1 [1]                                                                | Advanced maternal age, pregnancy and birth                                                                                                                                               | 1997-2008             | Advanced maternal age (in combination smoking)           | Complications during pregnancy and delivery                                 |
| 2 [2]                                                                | Maternal Smoking During Pregnancy and the Risk of Psychiatric Morbidity in Singleton Sibling Pairs                                                                                       | 1987-1995             | Maternal smoking                                         | Psychiatric morbidity                                                       |
| 3 [3]                                                                | Towards national comprehensive gestational diabetes screening - consequences for neonatal outcome and care                                                                               | 2006                  | Gestational diabetes                                     | macrosomia, neonatal hypoglycaemia and the need for care in a neonatal ward |
| 4 [4]                                                                | At what age does the risk for adverse maternal and infant outcomes increase? Nationwide register-based study on first births in Finland in 2005-2014                                     | 2005-2014             | Maternal age                                             | Adverse birth outcomes                                                      |
| 5 [5]                                                                | Associations of maternal age with maternity care use and birth outcomes in primiparous women: a comparison of results in 1991 and 2008 in Finland                                        | 1991, 2008            | Maternal age                                             | Maternity care use, birth outcomes                                          |
| 6 [6]                                                                | Infant and childhood neurodevelopmental outcomes following prenatal exposure to selective serotonin reuptake inhibitors: overview and design of a Finnish Register-Based Study (FinESSI) | 1996-2010             | Selective serotonin reuptake inhibitors                  | Neurodevelopmental outcomes                                                 |
| 7 [7]                                                                | Birth outcomes after induced abortion: a nationwide register-based study of first births in Finland                                                                                      | 1996-2008             | Previous induced abortion                                | Birth outcomes                                                              |
| 8 [8]                                                                | The burden of OASIS increases along with socioeconomic position--register-based analysis of 980,733 births in Finland                                                                    | 1991-2020             | Parity, socioeconomic status, smoking, maternal age, ... | Obstetric anal sphincter injury                                             |

|                                                     |      |                                                                                                                                                                                                               |           |                                      |                                                               |
|-----------------------------------------------------|------|---------------------------------------------------------------------------------------------------------------------------------------------------------------------------------------------------------------|-----------|--------------------------------------|---------------------------------------------------------------|
| 9                                                   | [9]  | Obstetric risk factors and autism spectrum disorders in Finland                                                                                                                                               | 1990-2005 | Obstetric factors                    | Autism spectrum disorders                                     |
| 10                                                  | [10] | Smoking during pregnancy and risk of autism spectrum disorder in a Finnish National Birth Cohort                                                                                                              | 1987-2005 | Maternal smoking                     | Autism spectrum disorders                                     |
| 11                                                  | [11] | Prenatal Maternal Smoking and Tourette Syndrome: A Nationwide Register Study                                                                                                                                  |           | Maternal smoking                     | Tourette syndrome                                             |
| 12                                                  | [12] | Finnish Prenatal Study of Bipolar Disorders (FIPS-B): overview, design and description of the sample                                                                                                          | 1983-1998 |                                      | Bipolar disorders                                             |
| 13                                                  | [13] | Contribution of risk factors to extremely, very and moderately preterm births - register-based analysis of 1,390,742 singleton births                                                                         | 1987-2010 | Lifestyle, reproductive risk factors | Preterm birth                                                 |
| 14                                                  | [14] | Mother's education and perinatal problems in Finland                                                                                                                                                          | 1987      | Maternal education                   | Perinatal problems                                            |
| 15                                                  | [15] | The danger of overmatching in studies of the perinatal mortality and birthweight of infants born after assisted conception                                                                                    | 1991-1993 | Assisted pregnancy                   | Birth outcomes                                                |
| 19                                                  | [16] | Maternal predictors of perinatal mortality: the role of birthweight                                                                                                                                           | 1991-1993 | Maternal risk factors                | Perinatal mortality                                           |
| <b>Studies of trends in incidence or prevalence</b> |      |                                                                                                                                                                                                               |           |                                      |                                                               |
| 17                                                  | [17] | Eclampsia in Finland, 2006 to 2010                                                                                                                                                                            | 2006-2010 | NA                                   | Eclampsia                                                     |
| 18                                                  | [18] | Decreasing mortality during pregnancy and for a year after while mortality after termination of pregnancy remains high: a population-based register study of pregnancy-associated deaths in Finland 2001–2012 | 2001-2012 | NA                                   | Mortality during/after pregnancy and termination of pregnancy |
| 19                                                  | [19] | Fear of childbirth in nulliparous and multiparous women: a population-based analysis of all singleton births in Finland in 1997-2010                                                                          | 1997-2010 | NA                                   | Fear of childbirth                                            |
| 20                                                  | [20] | Social disparity affects the incidence of placental abruption among multiparous but not nulliparous women: a register-based analysis of 1,162,126 singleton births                                            | 1991-2010 | NA                                   | Placental abruption                                           |
| 21                                                  | [21] | A population-based register study to determine indications for episiotomy in Finland                                                                                                                          | 1997-2007 | NA                                   | Episiotomy                                                    |
| 22                                                  | [22] | Births by younger and older mothers in a population with late and regulated childbearing: Finland 1991                                                                                                        | 1991      | NA                                   | Maternal age                                                  |
| <b>Evaluation of health care quality</b>            |      |                                                                                                                                                                                                               |           |                                      |                                                               |

|                                                                     |      |                                                                                                                                                           |            |                                                                                                          |                                                                                  |
|---------------------------------------------------------------------|------|-----------------------------------------------------------------------------------------------------------------------------------------------------------|------------|----------------------------------------------------------------------------------------------------------|----------------------------------------------------------------------------------|
| 23                                                                  | [23] | A Comparison of Medical Birth Register Outcomes between Maternity Health Clinics and Integrated Maternity and Child Health Clinics in Southwest Finland.  | 2009       | Organisational model of clinic (maternity health clinic vs integrated maternity and child health clinic) | Utilisation of maternity care services or maternal and perinatal health outcomes |
| 24                                                                  | [24] | Amount of Antenatal Care Days in a Context of Effective Regionalization of Very Preterm Deliveries                                                        | 2004-2006  | Regionalisation of health care (Hospital level Type III vs Type II)                                      | Antenatal care days                                                              |
| 25                                                                  | [25] | Effect of hospital size and on-call arrangements on intrapartum and early neonatal mortality among low-risk new-borns in Finland                          | 2005-2009  | Hospital size and on call arrangements                                                                   | Early neonatal mortality (including stillbirths)                                 |
| 26                                                                  | [26] | Influence of delivery characteristics and socioeconomic status on giving birth by caesarean section - a cross sectional study during 2000-2010 in Finland | 2000-2010  | Delivery characteristics, socioeconomic status                                                           | Delivery by caesarean section                                                    |
| 27                                                                  | [27] | The effect of birth in secondary- or tertiary-level hospitals in Finland on mortality in very preterm infants: a birth-register study                     | 2000-2005  | Regionalisation of health care (Hospital level Type III vs Type II)                                      | Mortality in very preterm infants                                                |
| <b>Evaluation of accuracy of data in the Medical Birth Register</b> |      |                                                                                                                                                           |            |                                                                                                          |                                                                                  |
| 28                                                                  | [28] | Health registers as a feasible means of measuring health status in childhood--a 7-year follow-up of the 1987 Finnish birth cohort                         | 1987       | NA                                                                                                       | Health status                                                                    |
| 29                                                                  | [29] | Data quality after restructuring a national medical registry                                                                                              | 1987, 1991 | NA                                                                                                       | Items recorded in the MBR                                                        |

## References

1. Lamminpää R: **Advanced Maternal Age, Pregnancy and Birth.** *PhD.* University of Eastern Finland, 2015
2. Ekblad M, Lehtonen L, Korkeila J, Gissler M: **Maternal Smoking During Pregnancy and the Risk of Psychiatric Morbidity in Singleton Sibling Pairs.** *Nicotine Tob Res* 2017, **19**(5):597-604.
3. Koivunen S, Torkki A, Bloigu A, Gissler M, Pouta A, Kajantie E, Vaarasmaki M: **Towards national comprehensive gestational diabetes screening - consequences for neonatal outcome and care.** *Acta Obstet Gynecol Scand* 2017, **96**(1):106-113.
4. Klemetti R, Gissler M, Sainio S, Hemminki E: **At what age does the risk for adverse maternal and infant outcomes increase? Nationwide register-based study on first births in Finland in 2005-2014.** *Acta Obstet Gynecol Scand* 2016, **95**(12):1368-1375.
5. Klemetti R, Gissler M, Sainio S, Hemminki E: **Associations of maternal age with maternity care use and birth outcomes in primiparous women: a comparison of results in 1991 and 2008 in Finland.** *BJOG* 2014, **121**(3):356-362.
6. Malm H, Artama M, Brown AS, Gissler M, Gyllenberg D, Hinkka-Yli-Salomaki S, McKeague I, Sourander A: **Infant and childhood neurodevelopmental outcomes following prenatal exposure to selective serotonin reuptake inhibitors: overview and design of a Finnish Register-Based Study (FinESSI).** *BMC Psychiatry* 2012, **12**:217-244X-12-217.
7. Klemetti R, Gissler M, Niinimäki M, Hemminki E: **Birth outcomes after induced abortion: a nationwide register-based study of first births in Finland.** *Hum Reprod* 2012, **27**(11):3315-3320.
8. Raisanen S, Cartwright R, Gissler M, Kramer MR, Heinonen S: **The burden of OASIS increases along with socioeconomic position--register-based analysis of 980,733 births in Finland.** *PLoS One* 2013, **8**(8):e73515.
9. Polo-Kantola P, Lampi KM, Hinkka-Yli-Salomaki S, Gissler M, Brown AS, Sourander A: **Obstetric risk factors and autism spectrum disorders in Finland.** *J Pediatr* 2014, **164**(2):358-365.
10. Tran PL, Lehti V, Lampi KM, Helenius H, Suominen A, Gissler M, Brown AS, Sourander A: **Smoking during pregnancy and risk of autism spectrum disorder in a Finnish National Birth Cohort.** *Paediatr Perinat Epidemiol* 2013, **27**(3):266-274.
11. Leivonen S, Chudal R, Joelsson P, Ekblad M, Suominen A, Brown AS, Gissler M, Voutilainen A, Sourander A: **Prenatal Maternal Smoking and Tourette Syndrome: A Nationwide Register Study.** *Child Psychiatry Hum Dev* 2016, **47**(1):75-82.
12. Chudal R, Sucksdorff D, Suominen A, Lehti V, Hinkka-Yli-Salomaki S, Huttunen J, Ristkari T, Gissler M, McKeague IW, Brown AS, Sourander A: **Finnish Prenatal Study of Bipolar Disorders (FIPS-B): overview, design and description of the sample.** *Nord J Psychiatry* 2014, **68**(3):169-179.
13. Raisanen S, Gissler M, Saari J, Kramer M, Heinonen S: **Contribution of risk factors to extremely, very and moderately preterm births - register-based analysis of 1,390,742 singleton births.** *PLoS One* 2013, **8**(4):e60660.
14. Hemminki E, Meriläinen J, Malin M, Rahkonen O, Teperi J: **Mother's education and perinatal problems in Finland.** *Int J Epidemiol* 1992, **21**(4):720-724.
15. Gissler M, Hemminki E: **The danger of overmatching in studies of the perinatal mortality and birthweight of infants born after assisted conception.** *Eur J Obstet Gynecol Reprod Biol* 1996, **69**(2):73-75.
16. Forssas E, Gissler M, Sihvonen M, Hemminki E: **Maternal predictors of perinatal mortality: the role of birthweight.** *Int J Epidemiol* 1999, **28**(3):475-478.

17. Jaatinen N, Ekholm E: **Eclampsia in Finland; 2006 to 2010.** *Acta Obstet Gynecol Scand* 2016, **95**(7):787-792.
18. Karalis E, Ulander VM, Tapper AM, Gissler M: **Decreasing mortality during pregnancy and for a year after while mortality after termination of pregnancy remains high: a population-based register study of pregnancy-associated deaths in Finland 2001-2012.** *BJOG* 2016, .
19. Raisanen S, Lehto SM, Nielsen HS, Gissler M, Kramer MR, Heinonen S: **Fear of childbirth in nulliparous and multiparous women: a population-based analysis of all singleton births in Finland in 1997-2010.** *BJOG* 2014, **121**(8):965-970.
20. Raisanen S, Gissler M, Nielsen HS, Kramer MR, Williams MA, Heinonen S: **Social disparity affects the incidence of placental abruption among multiparous but not nulliparous women: a register-based analysis of 1,162,126 singleton births.** *Eur J Obstet Gynecol Reprod Biol* 2013, **171**(2):246-251.
21. Raisanen S, Vehvilainen-Julkunen K, Gissler M, Heinonen S: **A population-based register study to determine indications for episiotomy in Finland.** *Int J Gynaecol Obstet* 2011, **115**(1):26-30.
22. Hemminki E, Gissler M: **Births by younger and older mothers in a population with late and regulated childbearing: Finland 1991.** *Acta Obstet Gynecol Scand* 1996, **75**(1):19-27.
23. Tuominen M, Kaljonen A, Ahonen P, Makinen J, Rautava P: **A Comparison of Medical Birth Register Outcomes between Maternity Health Clinics and Integrated Maternity and Child Health Clinics in Southwest Finland.** *Int J Integr Care* 2016, **16**(3):1.
24. Helenius K, Helle E, Lehtonen L: **Amount of Antenatal Care Days in a Context of Effective Regionalization of Very Preterm Deliveries.** *J Pediatr* 2016, **169**:81-86.
25. Karalis E, Gissler M, Tapper AM, Ulander VM: **Effect of hospital size and on-call arrangements on intrapartum and early neonatal mortality among low-risk newborns in Finland.** *Eur J Obstet Gynecol Reprod Biol* 2016, **198**:116-119.
26. Raisanen S, Gissler M, Kramer MR, Heinonen S: **Influence of delivery characteristics and socioeconomic status on giving birth by caesarean section - a cross sectional study during 2000-2010 in Finland.** *BMC Pregnancy Childbirth* 2014, **14**:120-2393-14-120.
27. Rautava L, Lehtonen L, Peltola M, Korvenranta E, Korvenranta H, Linna M, Hallman M, Andersson S, Gissler M, Leipala J, Tammela O, Hakkinen U, PERFECT Preterm Infant Study Group: **The effect of birth in secondary- or tertiary-level hospitals in Finland on mortality in very preterm infants: a birth-register study.** *Pediatrics* 2007, **119**(1):e257-63.
28. Gissler M, Hemminki E, Louhiala P, Jarvelin MR: **Health registers as a feasible means of measuring health status in childhood--a 7-year follow-up of the 1987 Finnish birth cohort.** *Paediatr Perinat Epidemiol* 1998, **12**(4):437-455.
29. Gissler M, Teperi J, Hemminki E, Merilainen J: **Data quality after restructuring a national medical registry.** *Scand J Soc Med* 1995, **23**(1):75-80.
